# Supplementary material
Source: publisher figshare collection journal article supplement (https://sage.figshare.com/ndownloader/files/16587437)
Supplement: Supplementary file 1 [file 16587437]

**Table 1 Supplement: Variable Descriptions and Sources**

| <b>Variable</b>                                             | <b>Description</b>                                                                                                                                                                                                                                                                                                       | <b>Source</b>                                                                                                                                                                                                |
|-------------------------------------------------------------|--------------------------------------------------------------------------------------------------------------------------------------------------------------------------------------------------------------------------------------------------------------------------------------------------------------------------|--------------------------------------------------------------------------------------------------------------------------------------------------------------------------------------------------------------|
| <i>Adoption of performance funding (dependent variable)</i> | The variable is dichotomous and coded 1 if a state adopted the policy for the first time or readopted the policy after abandoning it and zero otherwise.                                                                                                                                                                 | Burke and Serban 1998; Burke and Modarresi 2000; Burke and Modarresi 2001; Burke, Minassians, and Nelson 2003; Dougherty et al. 2013; Rabovsky 2012, Rutherford and Rabovsky 2014; Tandberg and Hillman 2014 |
| <i>Consolidated governing board</i>                         | this study follows previous research using a binary variable coded as 1 if a state has a consolidated governing board and 0 if it has a coordinating board or planning agency (Hicklin and Meier 2008; Lowry 2001; Nicholson-Crotty and Meier 2003; McLendon, Heller, and Young 2005; McLendon, Hearn, and Deaton 2006). | McGuinness (1988, 1994, 1997) and Tandberg (personal communication, 2015).                                                                                                                                   |
| <i>Growth in tuition</i>                                    | This variable measures the 3-year average percent change in tuition for each state's flagship institution, and is lagged one year.                                                                                                                                                                                       | Council for Opportunity in Education                                                                                                                                                                         |
| <i>Completion rate</i>                                      | This variable measures degrees (undergraduate and graduate) awarded as a percentage of total enrollment across all public 4-year colleges and universities in a state, and is lagged one year.                                                                                                                           | Integrated Postsecondary Education Data System                                                                                                                                                               |
| <i>Educational Attainment</i>                               | This variable measures the percentage of each state's population age 25 and over that has at least a Bachelor's degree, and is lagged one year.                                                                                                                                                                          | U.S. Census Bureau.                                                                                                                                                                                          |
| <i>Percent Republicans</i>                                  | This variable measures the total percentage of Republican members in a state's legislature.                                                                                                                                                                                                                              | Klarner's State Partisan Balance dataset                                                                                                                                                                     |
| <i>Republican governor</i>                                  | This is a binary variable indicating whether a state has a Republican governor.                                                                                                                                                                                                                                          | Klarner's State Partisan Balance dataset.                                                                                                                                                                    |
| <i>State support for public higher ed</i>                   | This variable measures state expenditures on higher education as a percentage of GSP, lagged one year.                                                                                                                                                                                                                   | Council for Opportunity in Education                                                                                                                                                                         |
| <i>Change in PCI</i>                                        | This variable measures the three-year average percent change in per-capita personal income, and is lagged one year.                                                                                                                                                                                                      | U.S. Department of Commerce, Bureau of Economic Analysis.                                                                                                                                                    |
| <i>Unemployment</i>                                         | This variable measures the percentage of unemployed work-seeking residents in a state                                                                                                                                                                                                                                    | U.S. Department of Labor, Bureau of Labor Statistics.                                                                                                                                                        |
| <i>Diffusion</i>                                            | Percentage of neighboring states, defined as sharing a U.S. Census sub-region or physical border, previously adopting performance funding.                                                                                                                                                                               | Derived from dependent variable data                                                                                                                                                                         |

**Table 2 Supplement: Descriptive Statistics**

|                                    | Mean   | S.D.   | Min.   | Max.   |
|------------------------------------|--------|--------|--------|--------|
| Consolidated Governing Board       | 0.492  | 0.500  | 0      | 1      |
| Growth in Tuition                  | 4.364  | 4.070  | -6.833 | 25.752 |
| Completion Rate                    | 18.472 | 2.846  | 6.865  | 26.388 |
| Educational Attainment             | 24.692 | 5.450  | 11.1   | 44.408 |
| Percent Republicans                | 46.442 | 15.813 | 8.850  | 88.571 |
| Republican Governor                | 0.517  | 0.500  | 0      | 1      |
| Legislative Professionalism        | 0.197  | 0.129  | 0.027  | 0.659  |
| State Support for Higher Education | 2.445  | 0.929  | 0.055  | 6.114  |
| Change in PCI                      | 1.353  | 1.413  | -4.089 | 5.984  |
| Unemployment                       | 5.453  | 1.745  | 2.3    | 13.7   |
| Diffusion                          | 27.017 | 23.603 | 0      | 80     |
| Observations                       | 1,056  |        |        |        |

**Table 3 Supplement: State Adoptions of Performance Funding Policies**

| <b>Year</b> | <b>Adoptions</b>                                                  |
|-------------|-------------------------------------------------------------------|
| 1991        | Missouri^                                                         |
| 1993        | Kentucky^                                                         |
| 1994        | Colorado^, Florida                                                |
| 1995        | Arkansas^                                                         |
| 1996        | Minnesota^, South Carolina                                        |
| 1997        | South Dakota^, Washington^, Oklahoma                              |
| 1998        | Ohio, Illinois^                                                   |
| 1999        | Kansas^, New Jersey^, Texas^                                      |
| 2000        | Oregon, New York^, Pennsylvania                                   |
| 2005        | South Dakota                                                      |
| 2007        | Indiana, Kentucky*, New Mexico, Virginia                          |
| 2008        | Louisiana*                                                        |
| 2009        | Texas                                                             |
| 2011        | Arizona, Arkansas*, Colorado*, Minnesota*, Nevada, North Carolina |

^Subsequently abandoned policy; \*Readoption
